# Supplementary material
Source: PubMed Central journal article supplement (PMC5112586)
Supplement: NIHMS802965-supplement-04.pdf [file NIHMS802965-supplement-04.pdf]

**Supplementary Figure 1: Heat map of recurrent mutations in patients with histiocytic neoplasms based on results from prior sequencing studies [(8)\*, (9), (11), (12), (13), (14), (15), (16), (17)\*, (18)\*, (19), (20), (23), (24), (25)\*\*].** Each column represents a single patient.

The type of histiocytic neoplasm (LCH, ECD, JXG, RDD, HS, and ICH) is represented in the first row. The gene that is mutated or involved in a fusion is represented in the subsequent rows. As shown, *ARAF*, *MAP3K1*, and *PIK3CA* mutations have been shown to co-occur with *BRAF* V600E mutations in histiocytoses [(8)\*, (19), (20), (23)]. Also, *ARAF* mutations have been shown to co-occur with *NRAS* mutations in JXG [(8)\*], and an activating *BRAFF595L* mutation has been described to co-occur with an activating *HRAS* mutation in histiocytic sarcoma [(15)].
